# Supplementary material
Source: PubMed Central journal article supplement (PMC10205140)
Supplement: kaac074_suppl_supplementary_material.pdf [file kaac074_suppl_supplementary_material.pdf]

# Examining Daily Associations among Sleep, Stress, and Blood Pressure across Adulthood

## Supplemental Materials

We present the equations of each model run in the main text:

Model 1:

Check-in level:  $y_{ij}$  (physio/stress) =  $\beta_{0j} + r_{ij}$

Person level:  $\beta_{0j} = \gamma_{00} + \gamma_{01}$  (sleep variable) $_j + \gamma_{02-12}$  (covariates) $_j + u_{0j}$

Model 2:

Check-in level:  $y_{ij}$  (physio/stress) =  $\beta_{0j} + \beta_{1j}$ (sleep variable) $_{ij} + r_{ij}$

Person level:  $\beta_{0j} = \gamma_{00} + u_{0j}$

$$\beta_{1j} = \gamma_{10} + u_{1j}$$

Model 3:

Check-in level:  $y_{ij}$  (physio/stress) =  $\beta_{0j} + r_{ij}$

Person level:  $\beta_{0j} = \gamma_{00} + \gamma_{01}$  (sleep variable) $_j + \gamma_{02}$  (age) $_j + \gamma_{03}$  (sleep variable\*age) $_j + \gamma_{04-14}$  (covariates) $_j + u_{0j}$

Model 4:

Check-in level:  $y_{ij}$  (physio/stress) =  $\beta_{0j} + \beta_{1j}$  (sleep) $_{ij} + r_{ij}$

Person level:  $\beta_{0j} = \gamma_{00} + \gamma_{01}$  (age) $_j + \gamma_{02-012}$  (covariates) $_j + u_{0j}$

$$\beta_{1j} = \gamma_{10} + \gamma_{11}$$
 (age) $_j + \gamma_{12-112}$  (covariates) $_j + u_{1j}$

In addition to the descriptive statistics reported in the main text, we used the program Mplus Version 8.4 to examine the within-person correlations between each of the sleep measures based on a maximum-likelihood estimation of the within-person covariance matrix. We also aggregated each sleep measure across check-ins and examined the between-person correlations between each sleep measure. The correlations between the sleep variables were moderate in magnitude, suggesting that the sleep measures are related but provide unique information (see Supplemental Table 1).

Supplemental Table 1. Within- and between-person correlation matrix of all daily sleep measures.

|                          | Sleep<br>duration | Sleep<br>efficiency | Subjective<br>sleep quality |
|--------------------------|-------------------|---------------------|-----------------------------|
| Sleep duration (hrs)     |                   | .59                 | .31                         |
| Sleep efficiency (%)     | .60               |                     | .48                         |
| Subjective sleep quality | .34               | .37                 |                             |

Note: Within-person correlations are presented below the diagonal. Between-person correlations are presented above the diagonal.

In the main text, we present one effect size estimate for the within-person analyses. Here we present the same results with additional columns for the additional effect size estimates based on the variance reductions from the fixed effects and random effects portions of the models.

Supplemental Table 2. Within-person relationships between sleep and physiologic/stress outcomes.

| <b><u>Predictors</u></b> |          |                    |          |          |          |             |              |              |
|--------------------------|----------|--------------------|----------|----------|----------|-------------|--------------|--------------|
| <b>Sleep Duration</b>    |          |                    |          |          |          |             |              |              |
| <b>DV</b>                | <i>N</i> | <b># Check-ins</b> | <i>b</i> | <i>t</i> | <i>p</i> | $r_w^{(f)}$ | $r_w^{(fI)}$ | $r_w^{(fv)}$ |
| Heart rate               | 3,089    | 20,966             | -.30     | -5.88    | < .001   | .14         | .05          | .13          |
| Systolic blood pressure  | 2,401    | 16,293             | -.10     | -2.18    | .029     | .12         | .02          | .12          |
| Diastolic blood pressure | 2,401    | 16,293             | -.00     | -.08     | .937     | .13         | .00          | .13          |
| Stress                   | 2,861    | 19,169             | -.05     | -10.54   | < .001   | .16         | .09          | .14          |
| <b>Sleep Efficiency</b>  |          |                    |          |          |          |             |              |              |
| <b>DV</b>                | <i>N</i> | <b># Check-ins</b> | <i>b</i> | <i>t</i> | <i>p</i> | $r_w^{(f)}$ | $r_w^{(fI)}$ | $r_w^{(fv)}$ |
| Heart rate               | 3,087    | 20,945             | -.03     | -3.87    | < .001   | .10         | .03          | .10          |
| Systolic blood pressure  | 2,399    | 16,282             | -.01     | -1.14    | .254     | .01         | .01          | .00          |
| Diastolic blood pressure | 2,399    | 16,282             | .00      | .30      | .768     | .00         | .00          | .00          |
| Stress                   | 2,857    | 19,151             | -.00     | -8.07    | < .001   | .15         | .08          | .13          |
| <b>Sleep Quality</b>     |          |                    |          |          |          |             |              |              |
| <b>DV</b>                | <i>N</i> | <b># Check-ins</b> | <i>b</i> | <i>t</i> | <i>p</i> | $r_w^{(f)}$ | $r_w^{(fI)}$ | $r_w^{(fv)}$ |
| Heart rate               | 4,235    | 26,218             | -.65     | -6.13    | < .001   | .14         | .04          | .14          |
| Systolic blood pressure  | 3,107    | 19,594             | -.39     | -4.07    | < .001   | .09         | .03          | .09          |
| Diastolic blood pressure | 3,107    | 19,594             | -.14     | -1.97    | .049     | .10         | .02          | .10          |
| Stress                   | 3,844    | 23,551             | -.16     | -16.68   | < .001   | .19         | .12          | .14          |

Note: Effect sizes,  $r_w^{(f)}$ , were calculated following recommendations by Rights and Sterba (2019). The  $r_w^{(f)}$  statistic is defined as the square root of the proportion of variance explained by within-person predictors via fixed slopes and random slope variation/covariation. This is similar to a measure of the square root of the proportion reduction in variance, akin to a correlation (32–34), but it may not correspond intuitively to  $t$ -values and  $p$ -values. The  $r_w^{(f)}$  statistic refers to the variance associated specifically with the fixed effects, whereas the  $r_w^{(fv)}$  statistic refers to the variance associated with the random slope variation/covariation. The  $r_w^{(f)}$  statistic more closely aligns with the  $t$ -values and  $p$ -values, but we reported the  $r_w^{(fv)}$  statistic in the manuscript because that statistic most closely corresponds to the effect size estimates that have been used in prior research.

Supplemental Table 3. Interaction coefficients of age moderation of between-person relationships.

| <b>Predictors</b>        |          |                    |          |          |          |
|--------------------------|----------|--------------------|----------|----------|----------|
| <b>Sleep Duration</b>    |          |                    |          |          |          |
| <b>DV</b>                | <i>N</i> | <b># Check-ins</b> | <i>b</i> | <i>t</i> | <i>p</i> |
| Heart rate               | 2,780    | 18,919             | -.00     | -.16     | .875     |
| Systolic blood pressure  | 2,160    | 14,616             | .02      | .97      | .332     |
| Diastolic blood pressure | 2,160    | 14,616             | -.02     | -.94     | .347     |
| Stress                   | 2,578    | 17,324             | .00      | 1.25     | .211     |
| <b>Sleep Efficiency</b>  |          |                    |          |          |          |
| <b>DV</b>                | <i>N</i> | <b># Check-ins</b> | <i>b</i> | <i>t</i> | <i>p</i> |
| Heart rate               | 2,778    | 18,899             | -.00     | -.16     | .876     |
| Systolic blood pressure  | 2,158    | 14,606             | .00      | .88      | .379     |
| Diastolic blood pressure | 2,158    | 14,606             | -.00     | -1.31    | .190     |
| Stress                   | 2,574    | 17,307             | .00      | .84      | .402     |
| <b>Sleep Quality</b>     |          |                    |          |          |          |
| <b>DV</b>                | <i>N</i> | <b># Check-ins</b> | <i>b</i> | <i>t</i> | <i>p</i> |
| Heart rate               | 3,795    | 23,535             | .02      | .54      | .585     |
| Systolic blood pressure  | 2,783    | 17,492             | .01      | .26      | .798     |
| Diastolic blood pressure | 2,783    | 17,492             | -.06     | -1.80    | .072     |
| Stress                   | 3,460    | 21,228             | .00      | 1.47     | .141     |

Supplemental Table 4. Between-person relationships between aggregated sleep measures and physiologic/stress outcomes among participants who completed at least 3-check-ins, at least 5-check-ins, and at least 7-check-ins.

| DV                       | Cutoff | <u>Predictors</u> |             |          |          |          |                                    |
|--------------------------|--------|-------------------|-------------|----------|----------|----------|------------------------------------|
|                          |        | Sleep Duration    |             |          |          |          |                                    |
|                          |        | <i>N</i>          | # Check-ins | <i>b</i> | <i>t</i> | <i>p</i> | <i>r<sub>b</sub><sup>(f)</sup></i> |
| Heart rate               | 3      | 2,780             | 18,919      | -1.09    | -6.33    | < .001   | .13                                |
| Heart rate               | 5      | 1,606             | 14,957      | -1.12    | -4.47    | < .001   | .13                                |
| Heart rate               | 7      | 1,060             | 11,989      | -1.02    | -3.19    | .001     | .11                                |
| Systolic blood pressure  | 3      | 2,160             | 14,616      | -.13     | -.46     | .648     | .02                                |
| Systolic blood pressure  | 5      | 1,259             | 11,558      | -.88     | -2.18    | .030     | .04                                |
| Systolic blood pressure  | 7      | 837               | 9,282       | -1.52    | -3.13    | .002     | .09                                |
| Diastolic blood pressure | 3      | 2,160             | 14,616      | -.13     | -.65     | .514     | .03                                |
| Diastolic blood pressure | 5      | 1,259             | 11,558      | -.52     | -1.81    | .070     | .05                                |
| Diastolic blood pressure | 7      | 837               | 9,282       | -.71     | -2.02    | .044     | .08                                |
| Stress                   | 3      | 2,578             | 17,324      | -.07     | -6.04    | < .001   | .11                                |
| Stress                   | 5      | 1,484             | 13,623      | -.08     | -4.85    | < .001   | .14                                |
| Stress                   | 7      | 963               | 10,806      | -.09     | -4.30    | < .001   | .17                                |
| DV                       | Cutoff | Sleep Efficiency  |             |          |          |          |                                    |
|                          |        | <i>N</i>          | # Check-ins | <i>b</i> | <i>t</i> | <i>p</i> | <i>r<sub>b</sub><sup>(f)</sup></i> |
|                          |        | Heart rate        | 3           | 2,778    | 18,899   | -.13     | -5.02                              |
| Heart rate               | 5      | 1,605             | 14,943      | -.15     | -4.10    | < .001   | .13                                |



|                          |   |       |        |      |       |        |     |
|--------------------------|---|-------|--------|------|-------|--------|-----|
| Heart rate               | 7 | 1,059 | 11,977 | -.17 | -3.65 | < .001 | .14 |
| Systolic blood pressure  | 3 | 2,158 | 14,606 | -.05 | -1.09 | .276   | .04 |
| Systolic blood pressure  | 5 | 1,259 | 11,555 | -.14 | -2.36 | .018   | .06 |
| Systolic blood pressure  | 7 | 837   | 9,279  | -.11 | -1.50 | .133   | .05 |
| Diastolic blood pressure | 3 | 2,158 | 14,606 | -.02 | -.65  | .515   | .02 |
| Diastolic blood pressure | 5 | 1,259 | 11,555 | -.08 | -1.76 | .078   | .03 |
| Diastolic blood pressure | 7 | 837   | 9,279  | -.04 | -.73  | .467   | .03 |
| Stress                   | 3 | 2,574 | 17,307 | -.01 | -8.15 | < .001 | .18 |
| Stress                   | 5 | 1,482 | 13,612 | -.02 | -7.09 | < .001 | .22 |
| Stress                   | 7 | 962   | 10,799 | -.02 | -5.78 | < .001 | .23 |

### Sleep Quality

| DV                       | Cutoff | N     | # Check-ins | <i>b</i> | <i>t</i> | <i>p</i> | <i>r<sub>b</sub><sup>(f)</sup></i> |
|--------------------------|--------|-------|-------------|----------|----------|----------|------------------------------------|
| Heart rate               | 3      | 3,795 | 23,535      | -1.78    | -4.76    | < .001   | .13                                |
| Heart rate               | 5      | 1,975 | 17,373      | -1.64    | -2.91    | .004     | .11                                |
| Heart rate               | 7      | 1,175 | 13,039      | -1.35    | -1.84    | .066     | .10                                |
| Systolic blood pressure  | 3      | 2,783 | 17,492      | -2.14    | -3.57    | < .001   | .05                                |
| Systolic blood pressure  | 5      | 1,492 | 13,107      | -2.02    | -2.33    | .020     | .05                                |
| Systolic blood pressure  | 7      | 911   | 9,979       | -2.31    | -2.18    | .030     | .05                                |
| Diastolic blood pressure | 3      | 2,783 | 17,492      | -1.47    | -3.35    | < .001   | .09                                |
| Diastolic blood pressure | 5      | 1,492 | 13,107      | -1.50    | -2.38    | .017     | .09                                |
| Diastolic blood pressure | 7      | 911   | 9,979       | -1.10    | -1.41    | .160     | .09                                |
| Stress                   | 3      | 3,460 | 21,228      | -.36     | -14.47   | < .001   | .28                                |

|        |   |       |        |      |        |        |     |
|--------|---|-------|--------|------|--------|--------|-----|
| Stress | 5 | 1,783 | 15,563 | -.41 | -12.14 | < .001 | .33 |
| Stress | 7 | 1,051 | 11,606 | -.45 | -10.37 | < .001 | .35 |

---

Supplemental Table 5. Within-person relationships between sleep and physiologic/stress outcomes among participants who completed at least 3-check-ins, at least 5-check-ins, and at least 7-check-ins.

|                          |               | <b><u>Predictors</u></b> |                    |                 |                 |                 |                                           |
|--------------------------|---------------|--------------------------|--------------------|-----------------|-----------------|-----------------|-------------------------------------------|
|                          |               | <b>Sleep Duration</b>    |                    |                 |                 |                 |                                           |
| <b>DV</b>                | <b>Cutoff</b> | <b><i>N</i></b>          | <b># Check-ins</b> | <b><i>b</i></b> | <b><i>t</i></b> | <b><i>p</i></b> | <b><i>r<sub>w</sub><sup>(f)</sup></i></b> |
| Heart rate               | 3             | 3,089                    | 20,966             | -.30            | -5.88           | < .001          | .14                                       |
| Heart rate               | 5             | 1,781                    | 16,558             | -.30            | -5.16           | < .001          | .14                                       |
| Heart rate               | 7             | 1,176                    | 13,270             | -.34            | -5.15           | < .001          | .15                                       |
| Systolic blood pressure  | 3             | 2,401                    | 16,293             | -.10            | -2.18           | .029            | .12                                       |
| Systolic blood pressure  | 5             | 1,406                    | 12,918             | -.13            | -2.58           | .010            | .14                                       |
| Systolic blood pressure  | 7             | 937                      | 10,385             | -.13            | -2.22           | .027            | .16                                       |
| Diastolic blood pressure | 3             | 2,401                    | 16,293             | -.00            | -.08            | .937            | .13                                       |
| Diastolic blood pressure | 5             | 1,406                    | 12,918             | -.03            | -.61            | .542            | .15                                       |
| Diastolic blood pressure | 7             | 937                      | 10,385             | -.02            | -.42            | .675            | .16                                       |
| Stress                   | 3             | 2,861                    | 19,169             | -.05            | -10.54          | < .001          | .16                                       |
| Stress                   | 5             | 1,641                    | 15,053             | -.05            | -9.32           | < .001          | .15                                       |
| Stress                   | 7             | 1,066                    | 11,946             | -.05            | -8.32           | < .001          | .16                                       |
|                          |               | <b>Sleep Efficiency</b>  |                    |                 |                 |                 |                                           |
| <b>DV</b>                | <b>Cutoff</b> | <b><i>N</i></b>          | <b># Check-ins</b> | <b><i>b</i></b> | <b><i>t</i></b> | <b><i>p</i></b> | <b><i>r<sub>w</sub><sup>(f)</sup></i></b> |
| Heart rate               | 3             | 3,087                    | 20,945             | -.03            | -3.87           | < .001          | .10                                       |
| Heart rate               | 5             | 1,779                    | 16,539             | -.03            | -3.61           | < .001          | .10                                       |

|                          |   |       |        |      |       |        |     |
|--------------------------|---|-------|--------|------|-------|--------|-----|
| Heart rate               | 7 | 1,175 | 13,258 | -.03 | -3.62 | < .001 | .11 |
| Systolic blood pressure  | 3 | 2,399 | 16,282 | -.01 | -1.14 | .254   | .01 |
| Systolic blood pressure  | 5 | 1,405 | 12,910 | -.01 | -1.54 | .123   | .02 |
| Systolic blood pressure  | 7 | 937   | 10,382 | -.01 | -1.24 | .214   | .01 |
| Diastolic blood pressure | 3 | 2,399 | 16,282 | .00  | .30   | .768   | .00 |
| Diastolic blood pressure | 5 | 1,405 | 12,910 | -.00 | -.05  | .961   | .00 |
| Diastolic blood pressure | 7 | 937   | 10,382 | .00  | .26   | .798   | .00 |
| Stress                   | 3 | 2,857 | 19,151 | -.00 | -8.07 | < .001 | .15 |
| Stress                   | 5 | 1,638 | 15,037 | -.00 | -7.07 | < .001 | .14 |
| Stress                   | 7 | 1,065 | 11,939 | -.00 | -6.38 | < .001 | .16 |

### Sleep Quality

| DV                       | Cutoff | N     | # Check-ins | b    | t      | p      | $r_w^{(f)}$ |
|--------------------------|--------|-------|-------------|------|--------|--------|-------------|
| Heart rate               | 3      | 4,235 | 26,218      | -.65 | -6.13  | < .001 | .14         |
| Heart rate               | 5      | 2,195 | 19,315      | -.61 | -5.19  | < .001 | .13         |
| Heart rate               | 7      | 1,309 | 14,516      | -.56 | -4.16  | < .001 | .13         |
| Systolic blood pressure  | 3      | 3,107 | 19,594      | -.39 | -4.07  | < .001 | .09         |
| Systolic blood pressure  | 5      | 1,671 | 14,715      | -.41 | -3.79  | < .001 | .09         |
| Systolic blood pressure  | 7      | 1,023 | 11,225      | -.30 | -2.43  | .015   | .10         |
| Diastolic blood pressure | 3      | 3,107 | 19,594      | -.14 | -1.97  | .049   | .10         |
| Diastolic blood pressure | 5      | 1,671 | 14,715      | -.16 | -1.98  | .047   | .11         |
| Diastolic blood pressure | 7      | 1,023 | 11,225      | -.13 | -1.49  | .137   | .11         |
| Stress                   | 3      | 3,844 | 23,551      | -.16 | -16.68 | < .001 | .19         |
| Stress                   | 5      | 1,975 | 17,251      | -.15 | -14.08 | < .001 | .18         |

|        |   |       |        |      |        |        |     |
|--------|---|-------|--------|------|--------|--------|-----|
| Stress | 7 | 1,167 | 12,884 | -.14 | -11.83 | < .001 | .18 |
|--------|---|-------|--------|------|--------|--------|-----|

---

Supplemental Table 6. Interaction coefficients of age moderation of between-person relationships among participants who completed at least 3-check-ins, at least 5-check-ins, and at least 7-check-ins.

| <b>Predictors</b>        |               |          |                    |          |          |          |
|--------------------------|---------------|----------|--------------------|----------|----------|----------|
| <b>Sleep Duration</b>    |               |          |                    |          |          |          |
| <b>DV</b>                | <b>Cutoff</b> | <b>N</b> | <b># Check-ins</b> | <b>b</b> | <b>t</b> | <b>p</b> |
| Heart rate               | 3             | 2780     | 18919              | -.00     | -.16     | .875     |
| Heart rate               | 5             | 1606     | 14957              | .01      | .28      | .782     |
| Heart rate               | 7             | 1060     | 11989              | -.01     | -.23     | .821     |
| Systolic blood pressure  | 3             | 2160     | 14616              | .02      | .97      | .332     |
| Systolic blood pressure  | 5             | 1259     | 11558              | .04      | 1.25     | .213     |
| Systolic blood pressure  | 7             | 837      | 9282               | .04      | .99      | .321     |
| Diastolic blood pressure | 3             | 2160     | 14616              | -.02     | -.94     | .347     |
| Diastolic blood pressure | 5             | 1259     | 11558              | -.02     | -.81     | .417     |
| Diastolic blood pressure | 7             | 837      | 9282               | -.02     | -.92     | .357     |
| Stress                   | 3             | 2578     | 17324              | .00      | 1.25     | .211     |
| Stress                   | 5             | 1484     | 13623              | -.00     | -.55     | .581     |
| Stress                   | 7             | 963      | 10806              | -.00     | -.13     | .896     |
| <b>Sleep Efficiency</b>  |               |          |                    |          |          |          |
| <b>DV</b>                | <b>Cutoff</b> | <b>N</b> | <b># Check-ins</b> | <b>b</b> | <b>t</b> | <b>p</b> |
| Heart rate               | 3             | 2778     | 18899              | -.00     | -.16     | .876     |
| Heart rate               | 5             | 1605     | 14943              | -.00     | -.95     | .343     |

|                          |   |      |       |      |       |      |
|--------------------------|---|------|-------|------|-------|------|
| Heart rate               | 7 | 1059 | 11977 | -.01 | -2.05 | .040 |
| Systolic blood pressure  | 3 | 2158 | 14606 | .00  | .88   | .379 |
| Systolic blood pressure  | 5 | 1259 | 11555 | .00  | .27   | .789 |
| Systolic blood pressure  | 7 | 837  | 9279  | .00  | .51   | .610 |
| Diastolic blood pressure | 3 | 2158 | 14606 | -.00 | -1.31 | .190 |
| Diastolic blood pressure | 5 | 1259 | 11555 | -.00 | -.90  | .369 |
| Diastolic blood pressure | 7 | 837  | 9279  | .00  | .11   | .913 |
| Stress                   | 3 | 2574 | 17307 | .00  | .84   | .402 |
| Stress                   | 5 | 1482 | 13612 | -.00 | -.61  | .543 |
| Stress                   | 7 | 962  | 10799 | -.00 | -.51  | .613 |

### Sleep Quality

| DV                       | Cutoff | <i>N</i> | # Check-ins | <i>b</i> | <i>t</i> | <i>p</i> |
|--------------------------|--------|----------|-------------|----------|----------|----------|
| Heart rate               | 3      | 3795     | 23535       | .02      | .54      | .585     |
| Heart rate               | 5      | 1975     | 17373       | .02      | .54      | .588     |
| Heart rate               | 7      | 1175     | 13039       | -.07     | -1.22    | .224     |
| Systolic blood pressure  | 3      | 2783     | 17492       | .01      | .26      | .798     |
| Systolic blood pressure  | 5      | 1492     | 13107       | -.02     | -.29     | .772     |
| Systolic blood pressure  | 7      | 911      | 9979        | -.03     | -.31     | .759     |
| Diastolic blood pressure | 3      | 2783     | 17492       | -.06     | -1.80    | .072     |
| Diastolic blood pressure | 5      | 1492     | 13107       | -.03     | -.64     | .524     |
| Diastolic blood pressure | 7      | 911      | 9979        | -.04     | -.63     | .529     |
| Stress                   | 3      | 3460     | 21228       | .00      | 1.47     | .141     |

|        |   |      |       |     |      |      |
|--------|---|------|-------|-----|------|------|
| Stress | 5 | 1783 | 15563 | .00 | 1.85 | .065 |
| Stress | 7 | 1051 | 11606 | .01 | 1.72 | .087 |

---



Supplemental Table 7. Cross-level interaction coefficients of age moderation of within-person relationships among participants who completed at least 3-check-ins, at least 5-check-ins, and at least 7-check-ins.

|                          |               | <b>Predictors</b>       |                    |          |          |          |
|--------------------------|---------------|-------------------------|--------------------|----------|----------|----------|
|                          |               | <b>Sleep Duration</b>   |                    |          |          |          |
| <b>DV</b>                | <b>Cutoff</b> | <i>N</i>                | <b># Check-ins</b> | <i>b</i> | <i>t</i> | <i>p</i> |
| Heart rate               | 3             | 2780                    | 18919              | .010     | 2.27     | .023     |
| Heart rate               | 5             | 1606                    | 14957              | .013     | 2.69     | .007     |
| Heart rate               | 7             | 1060                    | 11989              | .015     | 2.76     | .006     |
| Systolic blood pressure  | 3             | 2160                    | 14616              | .012     | 2.60     | .009     |
| Systolic blood pressure  | 5             | 1259                    | 11558              | .014     | 2.82     | .005     |
| Systolic blood pressure  | 7             | 837                     | 9282               | .009     | 1.47     | .142     |
| Diastolic blood pressure | 3             | 2160                    | 14616              | .007     | 2.09     | .036     |
| Diastolic blood pressure | 5             | 1259                    | 11558              | .008     | 2.10     | .036     |
| Diastolic blood pressure | 7             | 837                     | 9282               | .002     | .37      | .713     |
| Stress                   | 3             | 2578                    | 17324              | .000     | .61      | .540     |
| Stress                   | 5             | 1484                    | 13623              | .000     | 1.01     | .314     |
| Stress                   | 7             | 963                     | 10806              | .000     | .89      | .373     |
|                          |               | <b>Sleep Efficiency</b> |                    |          |          |          |
| <b>DV</b>                | <b>Cutoff</b> | <i>N</i>                | <b># Check-ins</b> | <i>b</i> | <i>t</i> | <i>p</i> |
| Heart rate               | 3             | 2778                    | 18899              | .001     | .96      | .339     |
| Heart rate               | 5             | 1605                    | 14943              | .000     | .93      | .354     |

|                          |   |      |       |       |      |      |
|--------------------------|---|------|-------|-------|------|------|
| Heart rate               | 7 | 1059 | 11977 | .001  | .63  | .532 |
| Systolic blood pressure  | 3 | 2158 | 14606 | .001  | 1.32 | .188 |
| Systolic blood pressure  | 5 | 1259 | 11555 | .001  | 1.56 | .120 |
| Systolic blood pressure  | 7 | 837  | 9279  | .000  | .25  | .805 |
| Diastolic blood pressure | 3 | 2158 | 14606 | .001  | 1.49 | .136 |
| Diastolic blood pressure | 5 | 1259 | 11555 | .001  | 1.48 | .139 |
| Diastolic blood pressure | 7 | 837  | 9279  | .000  | .36  | .723 |
| Stress                   | 3 | 2574 | 17307 | .000  | .01  | .989 |
| Stress                   | 5 | 1482 | 13612 | .000  | .06  | .955 |
| Stress                   | 7 | 962  | 10799 | -.000 | -.61 | .540 |

**Sleep Quality**

| <b>DV</b>                | <b>Cutoff</b> | <b>N</b> | <b># Check-ins</b> | <b><i>b</i></b> | <b><i>t</i></b> | <b><i>p</i></b> |
|--------------------------|---------------|----------|--------------------|-----------------|-----------------|-----------------|
| Heart rate               | 3             | 3795     | 23535              | .023            | 2.42            | .016            |
| Heart rate               | 5             | 1975     | 17373              | .023            | 2.13            | .033            |
| Heart rate               | 7             | 1175     | 13039              | .017            | 1.39            | .166            |
| Systolic blood pressure  | 3             | 2783     | 17492              | .022            | 2.45            | .014            |
| Systolic blood pressure  | 5             | 1492     | 13107              | .022            | 2.12            | .034            |
| Systolic blood pressure  | 7             | 911      | 9979               | .018            | 1.52            | .129            |
| Diastolic blood pressure | 3             | 2783     | 17492              | .007            | .95             | .345            |
| Diastolic blood pressure | 5             | 1492     | 13107              | .003            | .33             | .744            |
| Diastolic blood pressure | 7             | 911      | 9979               | -.001           | -.12            | .901            |
| Stress                   | 3             | 3460     | 21228              | .002            | 2.46            | .014            |

|        |   |      |       |      |      |      |
|--------|---|------|-------|------|------|------|
| Stress | 5 | 1783 | 15563 | .002 | 2.45 | .015 |
| Stress | 7 | 1051 | 11606 | .002 | 1.91 | .056 |

---

Supplemental Table 8. Between-person relationships between aggregated sleep measures (including sleep midpoint) and physiologic/stress outcomes.

| <b><u>Predictors</u></b> |          |                    |          |          |          |                                    |
|--------------------------|----------|--------------------|----------|----------|----------|------------------------------------|
| <b>Sleep Duration</b>    |          |                    |          |          |          |                                    |
| <b>DV</b>                | <i>N</i> | <b># Check-ins</b> | <i>b</i> | <i>t</i> | <i>p</i> | <i>r<sub>b</sub><sup>(f)</sup></i> |
| Heart rate               | 2,780    | 18,919             | -1.09    | -6.33    | < .001   | .13                                |
| Systolic blood pressure  | 2,160    | 14,616             | -.13     | -.46     | .648     | .02                                |
| Diastolic blood pressure | 2,160    | 14,616             | -.13     | -.65     | .514     | .03                                |
| Stress                   | 2,578    | 17,324             | -.07     | -6.04    | < .001   | .11                                |
| <b>Sleep Efficiency</b>  |          |                    |          |          |          |                                    |
| <b>DV</b>                | <i>N</i> | <b># Check-ins</b> | <i>b</i> | <i>t</i> | <i>p</i> | <i>r<sub>b</sub><sup>(f)</sup></i> |
| Heart rate               | 2,778    | 18,899             | -.13     | -5.02    | < .001   | .13                                |
| Systolic blood pressure  | 2,158    | 14,606             | -.05     | -1.09    | .276     | .04                                |
| Diastolic blood pressure | 2,158    | 14,606             | -.02     | -.65     | .515     | .02                                |
| Stress                   | 2,574    | 17,307             | -.01     | -8.15    | < .001   | .18                                |
| <b>Sleep Midpoint</b>    |          |                    |          |          |          |                                    |
| <b>DV</b>                | <i>N</i> | <b># Check-ins</b> | <i>b</i> | <i>t</i> | <i>p</i> | <i>r<sub>b</sub><sup>(f)</sup></i> |
| Heart rate               | 3,719    | 23,001             | -.20     | -1.23    | .218     | .00                                |
| Systolic blood pressure  | 2,735    | 17,137             | -.37     | -1.48    | .140     | .05                                |
| Diastolic blood pressure | 2,735    | 17,137             | -.23     | -1.23    | .221     | .03                                |
| Stress                   | 3,394    | 20,795             | -.01     | -1.25    | .211     | .00                                |

**Sleep Quality**

| <b>DV</b>                | <i>N</i> | <b># Check-ins</b> | <i>b</i> | <i>t</i> | <i>p</i> | <i>r<sub>b</sub><sup>(f)</sup></i> |
|--------------------------|----------|--------------------|----------|----------|----------|------------------------------------|
| Heart rate               | 3,795    | 23,535             | -1.78    | -4.76    | < .001   | .13                                |
| Systolic blood pressure  | 2,783    | 17,492             | -2.14    | -3.57    | < .001   | .05                                |
| Diastolic blood pressure | 2,783    | 17,492             | -1.47    | -3.35    | < .001   | .09                                |
| Stress                   | 3,460    | 21,228             | -.36     | -14.47   | < .001   | .28                                |

Supplemental Table 9. Within-person relationships between sleep (including sleep midpoint) and physiologic/stress outcomes.

| <b><u>Predictors</u></b> |          |                    |          |          |          |                                    |
|--------------------------|----------|--------------------|----------|----------|----------|------------------------------------|
| <b>Sleep Duration</b>    |          |                    |          |          |          |                                    |
| <b>DV</b>                | <i>N</i> | <b># Check-ins</b> | <i>b</i> | <i>t</i> | <i>p</i> | <i>r<sub>w</sub><sup>(f)</sup></i> |
| Heart rate               | 3,089    | 20,966             | -.30     | -5.88    | < .001   | .14                                |
| Systolic blood pressure  | 2,401    | 16,293             | -.10     | -2.18    | .029     | .12                                |
| Diastolic blood pressure | 2,401    | 16,293             | -.00     | -.08     | .937     | .13                                |
| Stress                   | 2,861    | 19,169             | -.05     | -10.54   | < .001   | .16                                |
| <b>Sleep Efficiency</b>  |          |                    |          |          |          |                                    |
| <b>DV</b>                | <i>N</i> | <b># Check-ins</b> | <i>b</i> | <i>t</i> | <i>p</i> | <i>r<sub>w</sub><sup>(f)</sup></i> |
| Heart rate               | 3,087    | 20,945             | -.03     | -3.87    | < .001   | .10                                |
| Systolic blood pressure  | 2,399    | 16,282             | -.01     | -1.14    | .254     | .01                                |
| Diastolic blood pressure | 2,399    | 16,282             | .00      | .30      | .768     | .00                                |
| Stress                   | 2,857    | 19,151             | -.00     | -8.07    | < .001   | .15                                |
| <b>Sleep Midpoint</b>    |          |                    |          |          |          |                                    |
| <b>DV</b>                | <i>N</i> | <b># Check-ins</b> | <i>b</i> | <i>t</i> | <i>p</i> | <i>r<sub>w</sub><sup>(f)</sup></i> |
| Heart rate               | 4,138    | 25,556             | -.29     | -4.23    | < .001   | .15                                |
| Systolic blood pressure  | 3,045    | 19,146             | .03      | .52      | .606     | .07                                |
| Diastolic blood pressure | 3,045    | 19,146             | .02      | .37      | .712     | .11                                |
| Stress                   | 3,765    | 23,033             | -.05     | -8.12    | < .001   | .12                                |

**Sleep Quality**

| <b>DV</b>                | <i>N</i> | <b># Check-ins</b> | <i>b</i> | <i>t</i> | <i>p</i> | <i>r<sub>w</sub><sup>(f)</sup></i> |
|--------------------------|----------|--------------------|----------|----------|----------|------------------------------------|
| Heart rate               | 4,235    | 26,218             | -.65     | -6.13    | < .001   | .14                                |
| Systolic blood pressure  | 3,107    | 19,594             | -.39     | -4.07    | < .001   | .09                                |
| Diastolic blood pressure | 3,107    | 19,594             | -.14     | -1.97    | .049     | .10                                |
| Stress                   | 3,844    | 23,551             | -.16     | -16.68   | < .001   | .19                                |

Finally, we report supplemental analyses concerning quadratic effects of sleep duration at between and within-person levels of analysis. Between-persons, we found an inverse J-shaped quadratic effect for heart rate,  $b = .22$ ,  $t = 2.92$ ,  $p = .004$ , such that people who sleep less than five hours/night on average report the highest levels of heart rate on average; people who sleep between 8-9 hours/night report the lowest average heart rate; and those who sleep more than 9 hours/night report elevated heart rate levels (although not as high as those who sleep less than 5 hours/night). The non-linear effects for SBP, DBP, and stress were not significant ( $ps = .564$ ,  $.162$ , and  $.130$ , respectively). Within-persons, the non-linear associations were not significant for heart rate, SBP, or DBP ( $ps = .668$ ,  $.498$ , and  $.336$ , respectively), but we found a cubic relationship for stress,  $b = -.004$ ,  $t = -2.81$ ,  $p = .005$ . However, the cubic relationship did not fit the typical U-shaped or J-shaped pattern but looked more similar to a negative linear relationship.
